# Supplementary material
Source: publisher figshare collection journal article supplement (https://karger.figshare.com/ndownloader/files/8714185)
Supplement: Supplementary file 1 [file 8714185]

**Supplemental Table Optional: Characteristics of study participants with breastfeeding information at birth and body mass index data at 20 years of age**

| **Child factors** |  | **No** | **Column %** |
| --- | --- | --- | --- |
| Birthweight  < 2500g |  | 59 | 6.6 |
| ≥ 2500g |  | 831 | 93.4 |
| Gestational age  < 37 weeks |  | 75 | 8.4 |
| ≥ 37 weeks |  | 815 | 91.6 |
| Gender  male |  | 457 | 51.3 |
| female |  | 433 | 48.7 |
| **Maternal and family factors** | |  |  |
| Maternal age at birth  < 20 years |  | 37 | 4.2 |
| ≥ 20 years |  | 853 | 95.8 |
| Maternal education  < year 12 |  | 484 | 54.4 |
| ≥ year 12 |  | 406 | 45.6 |
| Family income at birth  < $12000 |  | 106 | 11.9 |
| ≥ $12000 |  | 784 | 88.1 |
| Maternal pre-pregnancy BMI  ≥ 25kg/m2 |  | 152 | 17.1 |
| < 25kg/m2 |  | 738 | 82.9 |
| Breastfeeding stopped by |  |  | Cumulative % |
| 4 months |  | 266 | 29.9 |
| 6 months |  | 350 | 39.3 |
| Other milk introduced before |  |  |  |
| 4 months |  | 369 | 41.5 |
| 6 months |  | 489 | 54.9 |

Complete data available for breastfeeding duration, time other milk introduced, body mass index at 20 years and covariates of maternal age and education at birth, family income at birth and maternal pre-pregnancy BMI.
